# Supplementary material for: Yunnan Baiyao Adjuvant Treatment for Patients with Hemoptysis: A Systematic Review and Meta-Analysis
Source: Evid Based Complement Alternat Med. 2022 Feb 22;2022:4931284. doi: 10.1155/2022/4931284 (PMC8888054; doi:10.1155/2022/4931284)
Supplement: Supplementary Materials — Supplementary File 1: the PICO framework. Supplementary File 2: the search strategy. [file 4931284.f1.zip]

Archive with 2 entries (2 files):
- 4931284.f1/PICO framework.docx
- 4931284.f1/Supplementary file 1 search strategy.docx
